# Supplementary material for: Aminobacter MSH1-Mineralisation of BAM in Sand-Filters Depends on Biological Diversity
Source: PLoS One. 2015 Jun 15;10(6):e0128838. doi: 10.1371/journal.pone.0128838 (PMC4468195; doi:10.1371/journal.pone.0128838)
Supplement: S1 Data — (XLSX) [file pone.0128838.s001.xlsx]

## Sheet: Sheet1
Dilution	log(bacterial CFU's/ml)
1	8.4639
1	8.5502
1	8.4928
2	8.6702
2	8.6749
2	8.7474
3	8.0531
3	7.7243
3	7.8976
4	8.6866
4	8.7126
4	8.6075
5	8.5877
5	8.5172
5	8.5587
6	8.7007
6	8.6107
6	8.5211
7	8.711
7	8.7193
7	8.6314
8	8.6884
8	8.6484
8	8.6981
9	8.8621
9	8.9365
9	8.8808
10	7
10	6.8451
10	7.0792
11	8.2648
11	8.683
11	8.3892
12	8.5391
12	8.4314
12	8.5237
13	n.d.
13	n.d.
13	n.d.
14	n.d.
14	n.d.
14	n.d.
